# Supplementary material
Source: MDPI journal article supplement (https://www.mdpi.com/2072-4292/15/4/1147)
Supplement: s1 [file s1]

Article

# Hyperspectral Image Classification via Information Theoretic Dimension Reduction

Md Rashedul Islam<sup>1</sup>, Ayasha Siddiqua<sup>2</sup>, Masud Ibn Afjal<sup>3</sup>, Md Palash Uddin<sup>4,5</sup> and Anwaar Ulhaq<sup>6,\*</sup>

<sup>1</sup> Department of Computer Science and Engineering, Hajee Mohammad Danesh Science and Technology University, Dinajpur-5200, Bangladesh; rashedul\_cse@hstu.ac.bd

<sup>2</sup> Department of Computer Science and Engineering, Hajee Mohammad Danesh Science and Technology University, Dinajpur-5200, Bangladesh; ayasha.cse@gmail.com

<sup>3</sup> Department of Computer Science and Engineering, Hajee Mohammad Danesh Science and Technology University, Dinajpur-5200, Bangladesh; masud@hstu.ac.bd

<sup>4</sup> Department of Computer Science and Engineering, Hajee Mohammad Danesh Science and Technology University, Dinajpur-5200, Bangladesh; palash\_cse@hstu.ac.bd

<sup>5</sup> School of Information Technology, Deakin University, Geelong, VIC 3220, Australia; m.uddin@deakin.edu.au

<sup>6</sup> School of Computing, Mathematics and Engineering, Charles Sturt University, NSW, Australia; aulhaq@csu.edu.au

\* Correspondence: aulhaq@csu.edu.au;

## List of supporting materials

**Table S1:** Training and testing samples of the AVIRIS IP dataset.

**Table S2:** Training and testing samples of the HYDICE WDM dataset.

**Table S3:** Training and testing samples of the ROSIS PU dataset.

**Table S4:** Error matrix using the MNF-nCCRE<sub>mRMR</sub> for the IP dataset.

**Table S5:** Error matrix using the MNF-nCCRE<sub>mRMR</sub> for the WDM dataset.

**Table S6:** Error matrix using the MNF-nCCRE<sub>mRMR</sub> for the ROSIS PU dataset.

**Table S1.** Training and testing samples of the AVIRIS IP dataset.

| Class               | Training data (50%) | Testing data (50%) |
|---------------------|---------------------|--------------------|
| Alfalfa (C1)        | 21                  | 20                 |
| Wheat (C2)          | 45                  | 71                 |
| Bldge-Grass (C3)    | 23                  | 20                 |
| Soybean-min (C4)    | 144                 | 175                |
| Stone-Steel (C5)    | 22                  | 29                 |
| Soybean-notil (C6)  | 110                 | 93                 |
| Grass/Pasture (C7)  | 110                 | 75                 |
| Corn-notill (C8)    | 42                  | 50                 |
| Soybean Clean (C9)  | 21                  | 15                 |
| Corn-min (C10)      | 65                  | 65                 |
| Hay-windrowed (C11) | 168                 | 145                |
| Woods (C12)         | 286                 | 256                |
| Grass/Trees (C13)   | 80                  | 100                |
| Corn (C14)          | 70                  | 80                 |
| Total samples       | 1207                | 1194               |

**Table S2.** Training and testing samples of the HYDICE WDM dataset.

| Class         | Training data (33%) | Testing data (67%) |
|---------------|---------------------|--------------------|
| Shadow (C1)   | 30                  | 33                 |
| Tree (C2)     | 385                 | 1457               |
| Roof (C3)     | 130                 | 130                |
| Water (C4)    | 455                 | 560                |
| Street (C5)   | 310                 | 389                |
| Grass (C6)    | 365                 | 910                |
| Total samples | 1675                | 3479               |

**Table S3.** Training and testing samples of the ROSIS PU dataset.

| Class                     | Training samples (17%) | Testing samples (83%) |
|---------------------------|------------------------|-----------------------|
| Asphalt (C1)              | 1200                   | 3500                  |
| Meadows (C2)              | 630                    | 4520                  |
| Gravel(C3)                | 120                    | 830                   |
| Tree (C4)                 | 321                    | 658                   |
| Painted metal sheets (C5) | 201                    | 690                   |
| Bare soil (C6)            | 532                    | 2697                  |
| Bitumen (C7)              | 135                    | 635                   |
| Self-Blocking Bricks (C8) | 326                    | 2698                  |
| Shadow (C9)               | 30                     | 352                   |
| Total Samples             | 3495                   | 16580                 |

**Table S4.** Error matrix using the MNF-nCCRE<sub>mRMR</sub> for the IP dataset.

[illegible]
